# Supplementary material
Source: publisher figshare collection journal article supplement (https://sage.figshare.com/ndownloader/files/24016435)
Supplement: Supplementary file 1 [file 24016435]

Appendix A. Example severity scores for 12 most frequent statute violation codes for sex and violent offenses

| Sex offenses | | |  | Violent offenses | | |
| --- | --- | --- | --- | --- | --- | --- |
| Statute # | FL statute literal code | Severity score |  | Statute # | FL statute literal code | Severity score |
| 800.04 | l/l, indec. aslt child u/16 | 7 |  | 843.01 | resisting officer w/violen. | 5 |
| 800.04(4)(a) | l/l batt. sex w/v12-15 | 8 |  | 784.021(1)(a) | agg asslt-w/wpn no intent to k | 6 |
| 794.011(5) | sex bat/injury not likely | 8 |  | 790.23 | fel/deli w/gun/conc wpn/ammo | 5 |
| 800.04(4) | l/l battery v 12-15 yo | 8 |  | 784.07(2)(b) | batt.leo/firfgt/ems/etc. | 4 |
| 794.011(2) | sex bat by adult/vctm lt 12 | 9 |  | 812.13(2)(c) | robb. no gun/ddly.wpn | 6 |
| 800.04(5)(b) | l/l molest v<12 off 18+ | 9 |  | 790.01(2) | carrying concealed firearm | 5 |
| 800.04(5)(c)(2) | l/l molest v12-15 off 18+ | 7 |  | 784.045(1)(a)1 | agg battery intended harm | 7 |
| 794.05(1) | adlt sex w/16-17 yr old | 6 |  | 812.13(2)(a) | robb. gun/deadly wpn | 9 |
| 800.04(6)(b) | l/l conduct v<16 off 18+ | 6 |  | 784.041 | felony battery | 6 |
| 800.04(3) | lewd aslt/sex bat vctm<16 | 7 |  | 784.021(1)(b) | agg asslt-intent commit felony | 6 |
| 794.011(3) | sex bat/ wpn. or force | 10 |  | 784.045(1)(a)2 | agg battery/w/deadly weapon | 7 |
| 800.04(7)(c) | l/l exhibit. v<16 off 18+ | 5 |  | 784.03(2) | 2+ simple battery | 1 |
| Property offenses | | |  | Drug offenses | | |
| Statute # | FL statute literal code | Severity score |  | Statute # | FL statute literal code | Severity score |
| 812.014(2)(c)1 | grand theft, 300 l/5,000 | 2 |  | 893.13(6)(a) | cocaine - possession | 3 |
| 810.02(4) | burg unocc struc/cv or att. | 4 |  | 893.13(1)(a)1 | cocaine-sale/manuf/deliv. | 5 |
| 812.019(1) | traffic in stolen property | 5 |  | 893.13(6)(a) | poss.control.subs/other | 3 |
| 812.014(2)(c)6 | grand theft motor vehicle | 4 |  | 893.13(1)(a)2 | marijuana-sale/manuf/del | 3 |
| 810.02(3)(a,b,d) | burg/dwell/occup.convey | 7 |  | 893.13(6)(a) | poss.marijuana ovr 20 grams | 1 |
| 831 | utter forged instrument | 2 |  | 893.13(2)(a)1 | cocaine-pur/poss w/int pur. | 4 |
| 812.014(3)(c) | petit theft/3rd conviction | 1 |  | 893.13(7)(a)9 | obt.sub by fraud or att. | 3 |
| 812.014 | grand theft,300 l/5,000 | 2 |  | 893.13(6)(a) | possess methamphetamine | 3 |
| 831.01 | forgery/uttering | 2 |  | 893.135(1)(b)1a | traff cocaine 28-u/200gr | 7 |
| 832 | worthless checks | 1 |  | 893.13(6)(a) | heroin-poss.less/10 grams | 3 |
| 831.02 | utter forged instrument | 2 |  | 893.13(1)(e)1 | sale coc. etc. 1k ft.rel/bs | 7 |
| 817.61 | fraud credit card | 2 |  | 893.13(1)(c)1 | sell/etc.coc/her.1000ft sch | 7 |

Appendix B. Post-matching results using CEM, matching sex offenders in 1995 – 1996 (treatment) to later years (control)

|  | (1) | | (2) | | (3) | | (4) | |
| --- | --- | --- | --- | --- | --- | --- | --- | --- |
|  | 1995-1996 | 1997-1998 | 1995-1996 | 1999-2000 | 1995-1996 | 2001-2002 | 1995-1996 | 2003-2004 |
| Age | 32.61 | 32.61 | 32.72 | 32.72 | 32.55 | 32.55 | 32.91 | 32.91 |
| Male | 0.99 | 0.99 | 0.99 | 0.99 | 0.99 | 0.99 | 1.00 | 1.00 |
| Black | 0.28 | 0.28 | 0.27 | 0.27 | 0.27 | 0.27 | 0.27 | 0.27 |
| White | 0.62 | 0.62 | 0.62 | 0.62 | 0.62 | 0.62 | 0.62 | 0.62 |
| Latino | 0.10 | 0.10 | 0.10 | 0.10 | 0.11 | 0.11 | 0.11 | 0.11 |
| Trial | 0.03 | 0.03 | 0.03 | 0.03 | 0.03 | 0.03 | 0.03 | 0.03 |
| Offense severity score | 7.34 | 7.34 | 7.32 | 7.32 | 7.33 | 7.33 | 7.34 | 7.34 |
| Prior record score | 3.37 | 3.48 | 3.27 | 3.15 | 3.16 | 2.91 | 3.25 | 3.07 |
| Scored to prison | 0.95 | 0.95 | 0.95 | 0.95 | 0.95 | 0.95 | 0.95 | 0.95 |
| Total matched n = | 3,434 |  | 3,388 |  | 3,351 |  | 3,343 |  |
| Percent tx matched = | 88% |  | 87% |  | 86% |  | 86% |  |
|  | (5) | | (6) | | (7) | | (8) | |
|  | 1995-1996 | 2005-2006 | 1995-1996 | 2007-2008 | 1995-1996 | 2009-2010 | 1995-1996 | 2011 |
| Age | 32.38 | 32.38 | 32.60 | 32.60 | 32.61 | 32.61 | 31.88 | 31.88 |
| Male | 1.00 | 1.00 | 1.00 | 1.00 | 1.00 | 1.00 | 1.00 | 1.00 |
| Black | 0.26 | 0.26 | 0.27 | 0.27 | 0.27 | 0.27 | 0.20 | 0.20 |
| White | 0.63 | 0.63 | 0.62 | 0.62 | 0.62 | 0.62 | 0.72 | 0.72 |
| Latino | 0.11 | 0.11 | 0.11 | 0.11 | 0.11 | 0.11 | 0.08 | 0.08 |
| Trial | 0.02 | 0.02 | 0.02 | 0.02 | 0.01 | 0.01 | 0.00 | 0.00 |
| Offense severity score | 7.35 | 7.35 | 7.34 | 7.34 | 7.35 | 7.35 | 7.37 | 7.37 |
| Prior record score | 3.08 | 2.82 | 3.05 | 2.75 | 3.11 | 3.04 | 2.77 | 2.37 |
| Scored to prison | 0.95 | 0.95 | 0.95 | 0.95 | 0.96 | 0.96 | 0.97 | 0.97 |
| Total matched n = | 3,246 |  | 3,281 |  | 3,264 |  | 1,751 |  |
| Percent tx matched = | 83% |  | 84% |  | 84% |  | 45% |  |

Notes: Prior record was coarsened using Sturge’s rule, the default binning algorithm. Percent matched refers to percent sex offenders in 1995-1996 matched (treatment) to a given control group (e.g., 1997-1998, 1999-2000, etc.).

Appendix C. UCR forcible rape rates and newspaper headlines

|  | Forcible Rape Rate (per 100,000) | | Newspaper Headlines (in 1,000s) | |
| --- | --- | --- | --- | --- |
| Year | National | Florida | National | Florida |
| 1995 | 37.1 | 48.2 | 2.1 | 2.3 |
| 1996 | 36.3 | 52.1 | 2.7 | 2.0 |
| 1997 | 35.9 | 52.1 | 3.6 | 2.0 |
| 1998 | 34.5 | 49.3 | 13.0 | 1.5 |
| 1999 | 32.8 | 45.5 | 21.1 | 1.5 |
| 2000 | 32.0 | 43.5 | 16.3 | 1.4 |
| 2001 | 31.8 | 40.6 | 15.3 | 1.3 |
| 2002 | 33.1 | 40.2 | 21.0 | 1.5 |
| 2003 | 32.3 | 39.4 | 18.4 | 1.5 |
| 2004 | 32.4 | 37.7 | 22.8 | 1.3 |
| 2005 | 31.8 | 36.7 | 22.9 | 1.6 |
| 2006 | 31.6 | 35.3 | 26.5 | 1.4 |
| 2007 | 30.6 | 32.9 | 28.8 | 1.5 |
| 2008 | 29.8 | 29.8 | 32.0 | 1.4 |
| 2009 | 29.1 | 29.3 | 38.6 | 1.1 |
| 2010 | 27.7 | 28.6 | 38.3 | 1.1 |
| 2011 | 27.0 | 27.9 | 44.2 | 1.2 |

Appendix D. Predicted probability of a prison sentence

| Panel A. Violent offenders | Panel B. Drug offenders |
| --- | --- |
| Panel C. Property offenders | Panel D. Other offenders |

Appendix E. Negative binomial regression analysis of sentence length on national headlines and covariates (sex offenders, n = 19,573)

|  | Model 1 | | | Model 2 | | |
| --- | --- | --- | --- | --- | --- | --- |
|  | b | S.E. | I.R.R. | b | S.E. | I.R.R. |
| *Main Effect* |  |  |  |  |  |  |
| National headlines | - | - | - | -0.008*** | 0.00 | 0.992 |
| *Quadratic Effect* |  |  |  |  |  |  |
| National headlines2 | - | - | - | 0.0002*** | 0.00 | 1.0002 |
| *Covariates* |  |  |  |  |  |  |
| Year | 0.020*** | 0.00 | 1.020 | 0.019*** | 0.00 | 1.019 |
| Age | 0.009*** | 0.00 | 1.009 | 0.009*** | 0.00 | 1.009 |
| Male | 0.243*** | 0.05 | 1.275 | 0.241*** | 0.05 | 1.273 |
| Black | -0.085*** | 0.01 | 0.918 | -0.085*** | 0.01 | 0.918 |
| Latino | -0.116*** | 0.02 | 0.891 | -0.116*** | 0.02 | 0.891 |
| Trial | 0.734*** | 0.02 | 2.083 | 0.736*** | 0.02 | 2.088 |
| Offense severity score | 0.266*** | 0.00 | 1.305 | 0.265*** | 0.00 | 1.304 |
| Prior record score | 0.008*** | 0.00 | 1.008 | 0.008*** | 0.00 | 1.008 |
| Scored to prison | 0.008 | 0.04 | 1.008 | 0.005 | 0.04 | 1.005 |
| Circuit 2 | -0.128** | 0.04 | 0.880 | -0.132** | 0.04 | 0.876 |
| Circuit 3 | -0.011 | 0.05 | 0.989 | -0.017 | 0.05 | 0.983 |
| Circuit 4 | -0.188*** | 0.03 | 0.829 | -0.193*** | 0.03 | 0.825 |
| Circuit 5 | 0.004 | 0.03 | 1.004 | -0.003 | 0.03 | 0.997 |
| Circuit 6 | -0.088** | 0.03 | 0.915 | -0.093** | 0.03 | 0.911 |
| Circuit 7 | -0.070* | 0.03 | 0.932 | -0.073* | 0.03 | 0.930 |
| Circuit 8 | -0.262*** | 0.04 | 0.770 | -0.266*** | 0.04 | 0.766 |
| Circuit 9 | 0.018 | 0.03 | 1.018 | 0.011 | 0.03 | 1.011 |
| Circuit 10 | 0.003 | 0.03 | 1.003 | -0.005 | 0.03 | 0.995 |
| Circuit 11 | -0.125*** | 0.03 | 0.882 | -0.126*** | 0.03 | 0.882 |
| Circuit 12 | 0.026 | 0.03 | 1.026 | 0.018 | 0.03 | 1.019 |
| Circuit 13 | 0.105** | 0.03 | 1.111 | 0.102** | 0.03 | 1.108 |
| Circuit 14 | 0.369*** | 0.04 | 1.446 | 0.371*** | 0.04 | 1.449 |
| Circuit 15 | 0.000 | 0.04 | 1.000 | -0.007 | 0.04 | 0.993 |
| Circuit 16 | -0.160* | 0.08 | 0.852 | -0.172* | 0.08 | 0.842 |
| Circuit 17 | 0.041 | 0.03 | 1.042 | 0.039 | 0.03 | 1.039 |
| Circuit 18 | -0.044 | 0.04 | 0.957 | -0.054 | 0.04 | 0.947 |
| Circuit 19 | 0.142*** | 0.03 | 1.153 | 0.138*** | 0.03 | 1.148 |
| Circuit 20 | 0.035 | 0.03 | 1.036 | 0.032 | 0.03 | 1.032 |
| Constant | -37.097*** | 2.36 |  | -36.183*** | 7.96 |  |

Notes: White and circuit 1 serve as reference categories.

*** p < .001, ** p < .01, * p < .05

Appendix F. Negative binomial regression analysis of sentence length on national headlines and covariates

|  | Violent offenders  n = 122,169 | | | Drug offenders  n = 114,863 | | | Property offenders  n = 127,068 | | | Other offenders  n = 36,871 | | |
| --- | --- | --- | --- | --- | --- | --- | --- | --- | --- | --- | --- | --- |
|  | b | S.E. | I.R.R. | b | S.E. | I.R.R. | b | S.E. | I.R.R. | b | S.E. | I.R.R. |
| *Main Effect* |  |  |  |  |  |  |  |  |  |  |  |  |
| Nat. headlines | 0.005*** | 0.00 | 1.005 | 0.002** | 0.00 | 1.002 | 0.001 | 0.00 | 1.001 | 0.004* | 0.00 | 1.004 |
| *Quadratic Effect* |  |  |  |  |  |  |  |  |  |  |  |  |
| Nat. headlines2 | -0.0001*** | 0.00 | 0.9999 | -0.00004** | 0.00 | 0.99996 | 0.000 | 0.00 | 1.000 | 0.000 | 0.00 | 1.000 |
| *Covariates* |  |  |  |  |  |  |  |  |  |  |  |  |
| Year | 0.007*** | 0.00 | 1.007 | 0.000 | 0.00 | 1.000 | 0.001 | 0.00 | 1.001 | -0.006* | 0.00 | 0.994 |
| Age | 0.003*** | 0.00 | 1.003 | 0.001* | 0.00 | 1.000 | 0.004*** | 0.00 | 1.004 | -0.001*** | 0.00 | 0.999 |
| Male | 0.194*** | 0.01 | 1.215 | 0.052*** | 0.01 | 1.053 | -0.016** | 0.01 | 0.984 | 0.043*** | 0.01 | 1.044 |
| Black | 0.060*** | 0.00 | 1.061 | -0.016** | 0.00 | 0.984 | 0.045*** | 0.00 | 1.046 | 0.060*** | 0.01 | 1.062 |
| Latino | -0.008 | 0.01 | 0.992 | 0.072*** | 0.01 | 1.074 | 0.045*** | 0.01 | 1.046 | 0.052*** | 0.01 | 1.054 |
| Trial | 0.908*** | 0.01 | 2.479 | 0.784*** | 0.01 | 2.191 | 0.925*** | 0.01 | 2.522 | 0.828*** | 0.02 | 2.289 |
| Offense severity | 0.327*** | 0.00 | 1.387 | 0.234*** | 0.00 | 1.263 | 0.196*** | 0.00 | 1.216 | 0.099*** | 0.00 | 1.104 |
| Prior record | 0.012*** | 0.00 | 1.012 | 0.010*** | 0.00 | 1.010 | 0.011*** | 0.00 | 1.011 | 0.008*** | 0.00 | 1.008 |
| Scored to prison | 0.032*** | 0.01 | 1.033 | 0.062*** | 0.01 | 1.064 | 0.056*** | 0.01 | 1.058 | 0.044*** | 0.01 | 1.045 |
| Circuit 2 | -0.158*** | 0.02 | 0.854 | -0.321*** | 0.02 | 0.725 | -0.163*** | 0.02 | 0.850 | -0.207*** | 0.03 | 0.813 |
| Circuit 3 | 0.012 | 0.02 | 1.012 | 0.026 | 0.02 | 1.026 | 0.044* | 0.02 | 1.045 | -0.005 | 0.03 | 0.995 |
| Circuit 4 | 0.199*** | 0.01 | 1.221 | 0.021 | 0.01 | 1.021 | 0.085*** | 0.01 | 1.089 | 0.040* | 0.02 | 1.041 |
| Circuit 5 | -0.066*** | 0.01 | 0.936 | -0.103*** | 0.01 | 0.902 | -0.072*** | 0.01 | 0.930 | -0.087*** | 0.02 | 0.917 |
| Circuit 6 | -0.081*** | 0.01 | 0.923 | -0.193*** | 0.01 | 0.824 | -0.122*** | 0.01 | 0.885 | -0.170*** | 0.02 | 0.843 |
| Circuit 7 | -0.046** | 0.01 | 0.955 | -0.131*** | 0.01 | 0.877 | -0.060*** | 0.01 | 0.942 | 0.131*** | 0.02 | 1.140 |
| Circuit 8 | -0.182*** | 0.02 | 0.834 | -0.281*** | 0.02 | 0.755 | -0.194*** | 0.02 | 0.824 | -0.178*** | 0.03 | 0.837 |
| Circuit 9 | -0.048*** | 0.01 | 0.953 | -0.177*** | 0.01 | 0.838 | -0.109*** | 0.01 | 0.897 | -0.114*** | 0.02 | 0.892 |
| Circuit 10 | -0.080*** | 0.01 | 0.923 | -0.282*** | 0.01 | 0.754 | -0.220*** | 0.01 | 0.802 | -0.179*** | 0.02 | 0.836 |
| Circuit 11 | -0.086*** | 0.01 | 0.918 | -0.174*** | 0.01 | 0.840 | -0.116*** | 0.01 | 0.890 | 0.020 | 0.02 | 1.020 |
| Circuit 12 | 0.036* | 0.02 | 1.037 | -0.127*** | 0.02 | 0.881 | -0.056*** | 0.01 | 0.945 | 0.008 | 0.02 | 1.008 |
| Circuit 13 | -0.025* | 0.01 | 0.976 | -0.163*** | 0.01 | 0.849 | -0.113*** | 0.01 | 0.893 | -0.139*** | 0.02 | 0.870 |
| Circuit 14 | -0.002 | 0.02 | 0.998 | 0.088*** | 0.01 | 1.091 | 0.056*** | 0.01 | 1.058 | 0.026 | 0.02 | 1.026 |
| Circuit 15 | -0.044** | 0.01 | 0.957 | -0.200*** | 0.01 | 0.819 | -0.148*** | 0.01 | 0.862 | -0.036 | 0.02 | 0.965 |
| Circuit 16 | -0.089** | 0.03 | 0.915 | -0.202*** | 0.02 | 0.817 | -0.067* | 0.03 | 0.935 | -0.083 | 0.05 | 0.920 |
| Circuit 17 | -0.037** | 0.01 | 0.963 | -0.126*** | 0.01 | 0.882 | -0.073*** | 0.01 | 0.930 | 0.038* | 0.02 | 1.039 |
| Circuit 18 | 0.037* | 0.02 | 1.037 | -0.159*** | 0.02 | 0.853 | -0.039** | 0.01 | 0.961 | -0.105*** | 0.02 | 0.900 |
| Circuit 19 | 0.176*** | 0.01 | 1.192 | 0.086*** | 0.01 | 1.089 | 0.129*** | 0.01 | 1.137 | 0.202*** | 0.02 | 1.224 |
| Circuit 20 | 0.015 | 0.01 | 1.015 | -0.103*** | 0.01 | 0.902 | -0.077*** | 0.01 | 0.926 | 0.003 | 0.02 | 1.003 |
| Constant | -13.345*** | 3.30 |  | 1.329 | 2.88 |  | -0.506 | 2.93 |  | 14.313** | 5.43 |  |

Notes: White and circuit 1 serve as reference categories. *** p < .001, ** p < .01, * p < .05

Appendix G. Logistic and negative binomial regression analysis of prison and prison sentence length (months) on offense-type x year interactions and covariates, sex offenses involving minor victims (n = 29,158) excluded

|  | Prison sentence (logistic) n = 1,848,609 | | | Sentence length (neg. binomial) n = 404,699 | | |
| --- | --- | --- | --- | --- | --- | --- |
|  | Coefficient | S.E. | O.R. | Coefficient | S.E. | I.R.R. |
| Main effects |  |  |  |  |  |  |
| Year | 0.056*** | 0.001 | 1.058 | 0.003*** | 0.000 | 1.003 |
| Sex offense | -98.238*** | 13.903 | 0.000 | -47.961*** | 4.842 | 0.000 |
| Violent offense | -4.191 | 2.510 | 0.015 | -9.023*** | 1.258 | 0.000 |
| Property offense | -0.473 | 2.393 | 0.623 | -1.847 | 1.264 | 0.158 |
| Other offense | -3.749 | 3.874 | 0.024 | -8.243*** | 2.076 | 0.000 |
| Interactions |  |  |  |  |  |  |
| Year * Sex | 0.049*** | 0.007 | 1.051 | 0.024*** | 0.002 | 1.025 |
| Year * Violent | 0.002 | 0.001 | 1.002 | 0.005*** | 0.001 | 1.005 |
| Year * Property | 0.000 | 0.001 | 1.000 | 0.001 | 0.001 | 1.001 |
| Year * Other | 0.002 | 0.002 | 1.002 | 0.004*** | 0.001 | 1.004 |
| Controls |  |  |  |  |  |  |
| Age | 0.000 | 0.000 | 1.000 | 0.002*** | 0.000 | 1.002 |
| Male | 0.425*** | 0.007 | 1.530 | 0.043*** | 0.004 | 1.044 |
| Black | 0.258*** | 0.005 | 1.294 | 0.050*** | 0.002 | 1.051 |
| Latino | 0.124*** | 0.008 | 1.132 | 0.043*** | 0.004 | 1.044 |
| Trial | 1.603*** | 0.017 | 4.968 | 0.921*** | 0.005 | 2.511 |
| Offense severity score | 0.222*** | 0.002 | 1.249 | 0.234*** | 0.001 | 1.264 |
| Prior record score | 0.027*** | 0.000 | 1.027 | 0.010*** | 0.000 | 1.010 |
| Scored to prison | 2.072*** | 0.006 | 7.944 | - | - | - |
| Circuit 2 | 0.055* | 0.019 | 1.056 | -0.218*** | 0.009 | 0.804 |
| Circuit 3 | 0.424*** | 0.023 | 1.528 | 0.028** | 0.011 | 1.029 |
| Circuit 4 | 0.612*** | 0.014 | 1.844 | 0.100*** | 0.007 | 1.105 |
| Circuit 5 | 0.127*** | 0.015 | 1.135 | -0.083*** | 0.007 | 0.921 |
| Circuit 6 | -0.149*** | 0.012 | 0.861 | -0.138*** | 0.006 | 0.871 |
| Circuit 7 | 0.367*** | 0.015 | 1.444 | -0.046*** | 0.007 | 0.955 |
| Circuit 8 | -0.253*** | 0.019 | 0.777 | -0.227*** | 0.009 | 0.797 |
| Circuit 9 | -0.209*** | 0.014 | 0.812 | -0.093*** | 0.007 | 0.911 |
| Circuit 10 | 0.836*** | 0.014 | 2.306 | -0.179*** | 0.007 | 0.836 |
| Circuit 11 | -1.413*** | 0.014 | 0.243 | -0.090*** | 0.007 | 0.913 |
| Circuit 12 | -0.126*** | 0.016 | 0.882 | -0.042*** | 0.008 | 0.959 |
| Circuit 13 | -0.247*** | 0.013 | 0.781 | -0.088*** | 0.006 | 0.916 |
| Circuit 14 | 0.919*** | 0.016 | 2.507 | 0.072*** | 0.008 | 1.075 |
| Circuit 15 | -0.512*** | 0.015 | 0.600 | -0.117*** | 0.008 | 0.890 |
| Circuit 16 | -0.251*** | 0.029 | 0.778 | -0.118*** | 0.015 | 0.889 |
| Circuit 17 | -0.148*** | 0.013 | 0.863 | -0.067*** | 0.006 | 0.936 |
| Circuit 18 | -0.052** | 0.016 | 0.949 | -0.050*** | 0.008 | 0.952 |
| Circuit 19 | 0.760*** | 0.015 | 2.137 | 0.148*** | 0.007 | 1.160 |
| Circuit 20 | -0.169*** | 0.014 | 0.844 | -0.039*** | 0.007 | 0.962 |
| Constant | -115.974*** | 1.738 |  | -3.675*** | 0.941 |  |

Notes: White, drug offense, and circuit 1 serve as reference categories.

*** p<.001, ** p<.01, * p < .05

Appendix H. Logistic regression analysis of incarceration (prison *or* jail, n = 878,988) on offense-type x year interactions and covariates

|  | Incarceration (prison or jail) sentence (logistic) n = 1,877,767 | | |
| --- | --- | --- | --- |
|  | Coefficient | S.E. | O.R. |
| Main effects |  |  |  |
| Year | 0.034*** | 0.001 | 1.035 |
| Sex offense | -167.298*** | 5.573 | 0.000 |
| Violent offense | -34.736*** | 1.948 | 0.000 |
| Property offense | -21.060*** | 1.680 | 0.000 |
| Other offense | -38.875*** | 2.622 | 0.000 |
| Interactions |  |  |  |
| Year * Sex | 0.083*** | 0.003 | 1.087 |
| Year * Violent | 0.017*** | 0.001 | 1.017 |
| Year * Property | 0.010*** | 0.001 | 1.010 |
| Year * Other | 0.019*** | 0.001 | 1.020 |
| Controls |  |  |  |
| Age | 0.007*** | 0.000 | 1.007 |
| Male | 0.395*** | 0.004 | 1.484 |
| Black | 0.312*** | 0.004 | 1.367 |
| Latino | -0.234*** | 0.006 | 0.791 |
| Trial | 1.092*** | 0.015 | 2.980 |
| Offense severity score | 0.037*** | 0.001 | 1.037 |
| Prior record score | 0.034*** | 0.000 | 1.035 |
| Scored to prison | 1.024*** | 0.005 | 2.785 |
| Circuit 2 | -0.326*** | 0.014 | 0.722 |
| Circuit 3 | -0.334*** | 0.019 | 0.716 |
| Circuit 4 | 1.361*** | 0.010 | 3.901 |
| Circuit 5 | 0.025* | 0.010 | 1.025 |
| Circuit 6 | 0.038*** | 0.009 | 1.039 |
| Circuit 7 | 0.240*** | 0.011 | 1.271 |
| Circuit 8 | -0.223*** | 0.014 | 0.800 |
| Circuit 9 | 0.385*** | 0.010 | 1.470 |
| Circuit 10 | 0.075*** | 0.011 | 1.078 |
| Circuit 11 | 0.185*** | 0.009 | 1.203 |
| Circuit 12 | 0.290*** | 0.011 | 1.336 |
| Circuit 13 | -0.233*** | 0.009 | 0.792 |
| Circuit 14 | -0.129*** | 0.013 | 0.879 |
| Circuit 15 | 0.728*** | 0.011 | 2.070 |
| Circuit 16 | -0.514*** | 0.021 | 0.598 |
| Circuit 17 | -0.162*** | 0.009 | 0.850 |
| Circuit 18 | -0.672*** | 0.012 | 0.510 |
| Circuit 19 | 0.471*** | 0.011 | 1.602 |
| Circuit 20 | 0.042*** | 0.010 | 1.043 |
| Constant | -69.487*** | 1.169 |  |

Notes: White, drug offense, and circuit 1 serve as reference categories. We did not analyze sentence length here because jail sentences are limited to 12 months or less.

*** p<.001, ** p<.01, * p < .05
